# Supplementary material
Source: PubMed Central journal article supplement (PMC3838085)
Supplement: JCM.01801-13_zjm999092953so1.pdf [file JCM.01801-13_zjm999092953so1.pdf]

## Supplemental Material

### *Nucleic Acid Extraction*

Nucleic acid extraction was performed using the EZ1 Virus Mini Kit, v2.0 on the EZ1 Advanced XL instrument (both from Qiagen, Valencia, CA). All extractions were carried out according to the manufacturer's recommendations. Extractions were performed using 200µl of patient plasma or urine and were eluted into 60µl of elution buffer. A plasmid containing sequence from the green fluorescent protein gene from *A. victoria* flanked by BK V3a Forward and V3a Reverse primer sequences (Supplementary Table 1) was added to each extraction to ensure adequate nucleic acid recovery and the absence of PCR inhibitors.

### *Quantitative, Real-Time PCR*

BKV DNA quantitation was performed using the LightCycler Taqman Master mix on the LightCycler 2.0 instrument (both from Roche Applied Science, Indianapolis, IN). Reactions were performed at a total volume of 20µl, and 10µl of purified nucleic acids were added to each reaction. The primer and probe concentrations in the final reaction mixture are listed in Supplemental Table 1. Cycling conditions were the following: 95°C for 10 min; 45 cycles of 95°C for 15 sec, 60°C for 30 sec, and 72°C for 40 sec. The ramp rate was set at 20°C/sec for each temperature change. Detection was performed in the green (530nm) and yellow (560nm) channels at 72°C. Negative and no template controls, as well as high positive and low positive BKV controls (Zeptomatrix, Buffalo, NY) were tested on each run. In addition, each run contained a five point standard curve

using pBKV34-2 plasmid (ATCC, Manassas, VA) containing the whole genome of the Dunlop reference. This assay has a linear range of 1,000 – 60,000,000 copies/ml plasma or urine.

### *Long-Range PCR and Sequencing*

BKV whole genomes were amplified by long-range PCR with four primer sets (Supplemental Table 2) using the SequalPrep Long PCR Kit (Invitrogen, Grand Island, NY). The 20 µl reactions were comprised of 2 µl 10x Reaction Buffer, 0.4 µl DMSO, 1 µl 10x Enhancer A, 1.8 U enzyme, and 250nM of each primer. Cycling conditions were: 94°C for 2 min; 5 cycles of 94°C for 10 sec, 60°C for 30 sec, and 68°C for 5 min; 35 cycles of 94°C for 10 sec, 60°C for 30 sec, and 68°C for 5 min/+20 sec/cycle; followed by a final extension at 68°C for 10 min. The complete BKV genomes were acquired by primer walking and were deposited in GenBank (KF055891-KF055893).

**Supplemental Table 1. BKV real-time PCR primers and probes.**

| <b>Name</b>     | <b>Sequence (5'-3')</b>                   | <b>Concentration</b> | <b>Position<sup>a</sup></b> | <b>Gene</b> |
|-----------------|-------------------------------------------|----------------------|-----------------------------|-------------|
| V3a Forward     | CCTTACCCAATTCCTTTTGCT                     | 1000nM               | 2458-2480                   | VP1         |
| V3a Reverse     | ATACATAGGCTGCCCATCCAC                     | 1000nM               | 2512-2532                   | VP1         |
| V3a Probe       | FAM-TGGGTTCTCCTGTTTATA-BHQ+               | 500nM                | 2490-2507                   | VP1         |
| GFPCal560 Probe | CalFluor560-TACCTGAGCACCCAGTCCGCCCT-BHQ-1 | 250nM                | NA                          | NA          |

<sup>a</sup>Relative to the Dunlop reference sequence (GenBank accession no. V01108)

FAM: Fluorescein amidite

Primers were obtained from Eurofins MWG Operon (Huntsville, AL)

Probes were obtained from Biosearch Technologies, Inc. (Novato, CA)

**Supplemental Table 2. BKV long-range PCR primers.**

| <b>Primer name</b> | <b>Primer Set</b> | <b>Sequence (5'-3')</b>            | <b>Position<sup>a</sup></b> | <b>Gene</b>     |
|--------------------|-------------------|------------------------------------|-----------------------------|-----------------|
| BK_HR              | 1                 | TCTGGGTTTAGGAAGCATTCTACCTCT        | 1700-1727                   | VP1             |
| BK_JF              | 1                 | AATTTAAATGAGGACCTAACCTGTGGAAATCT   | 1855-1886                   | VP1             |
| BK_KR              | 2                 | AGGCCTCTCCACTGTTGTGTCCAG           | 2387-2411                   | VP1             |
| BK_OF              | 2                 | CTGCTTTTGTATAAGCCACTTTTAAGCTTGTGT  | 2690-2722                   | Large T antigen |
| BK_OR              | 3                 | TGAATGGAAGGAAAGGCTGGATTCTGA        | 2987-3013                   | Large T antigen |
| BK_QF              | 3                 | ATTAGCAGTAGCAACAAGGTCATTCCACTTTGTA | 3065-3098                   | Large T antigen |
| BK_WR              | 4                 | CTTGCCTGCTTTGCTGTGTATAC            | 4316-4338                   | Large T antigen |
| BK_ZF              | 4                 | GCTTTAGATCTCTGAAGGGAGTTTCTCCAATT   | 4640-4671                   | Small t antigen |

<sup>a</sup>Relative to the Dunlop reference sequence (GenBank accession no. V01108)  
Primers were obtained from Integrated DNA Technologies (Coralville, IA)
